# Supplementary material for: S-phase Synchronization Facilitates the Early Progression of Induced-Cardiomyocyte Reprogramming through Enhanced Cell-Cycle Exit
Source: MDPI journal article supplement (doi:10.3390/ijms19051364), 2018-05-04
Supplement: s1 [file s1]

## SUPPLEMENTARY FIGURES

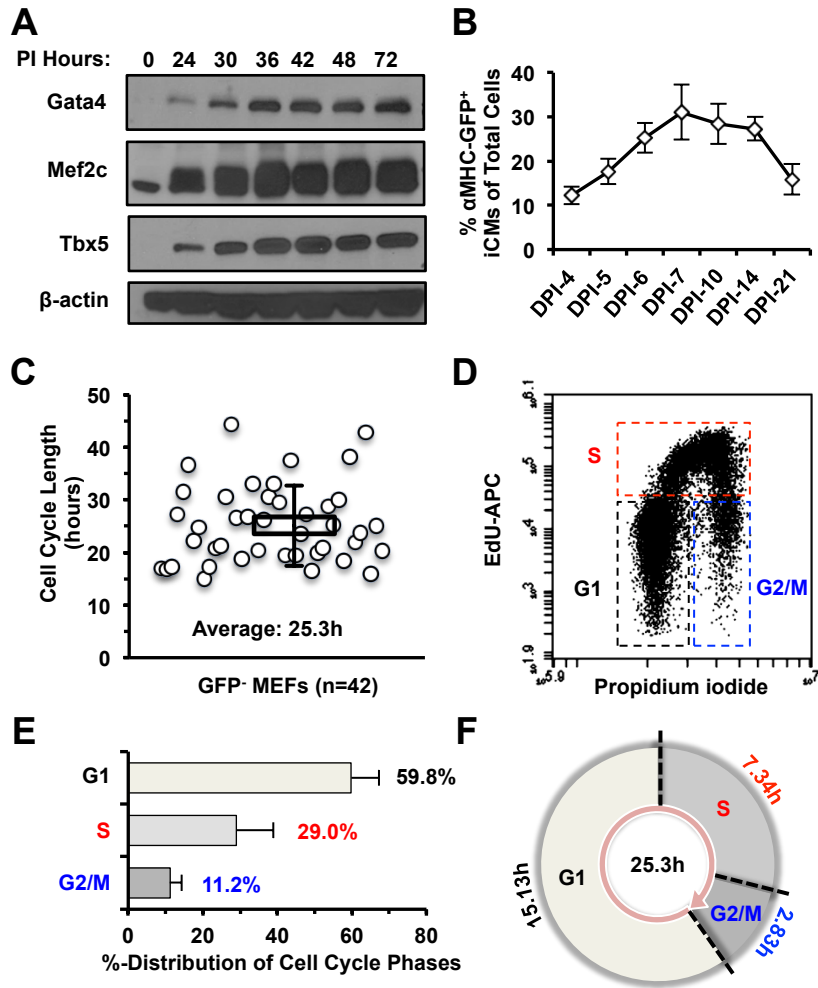

**Figure S1. iCM Reprogramming by monocistronic Gata4, Mef2c, and Tbx5 (GMT) and cell cycle length of MEFs.** **A)** Representative western blot image shows the expression of Gata4, Mef2c, and Tbx5 in MEFs at different post-infection (PI) hours. **B)** The percentage of αMHC-GFP<sup>+</sup> GMT-iCMs from DPI-4 to DPI-21 (n=3). **C)** Non-reprogrammed MEFs, which had two consecutive cell divisions in the time-lapse recordings (n=42), had an average of 25.3±7.4 hours cell-cycle length. **D)** Representative FACS plot of EdU assay with two-hour EdU-labeling showing a distribution of cell-cycle phases in MEFs. **E)** The average percentages of G1-, S-, and G2/M-phase in MEFs (n=4). **F)** MEFs had an average of 15.2-hour G1 phase, 7.3-hour S phase, and 2.8-hour G2/M phase.

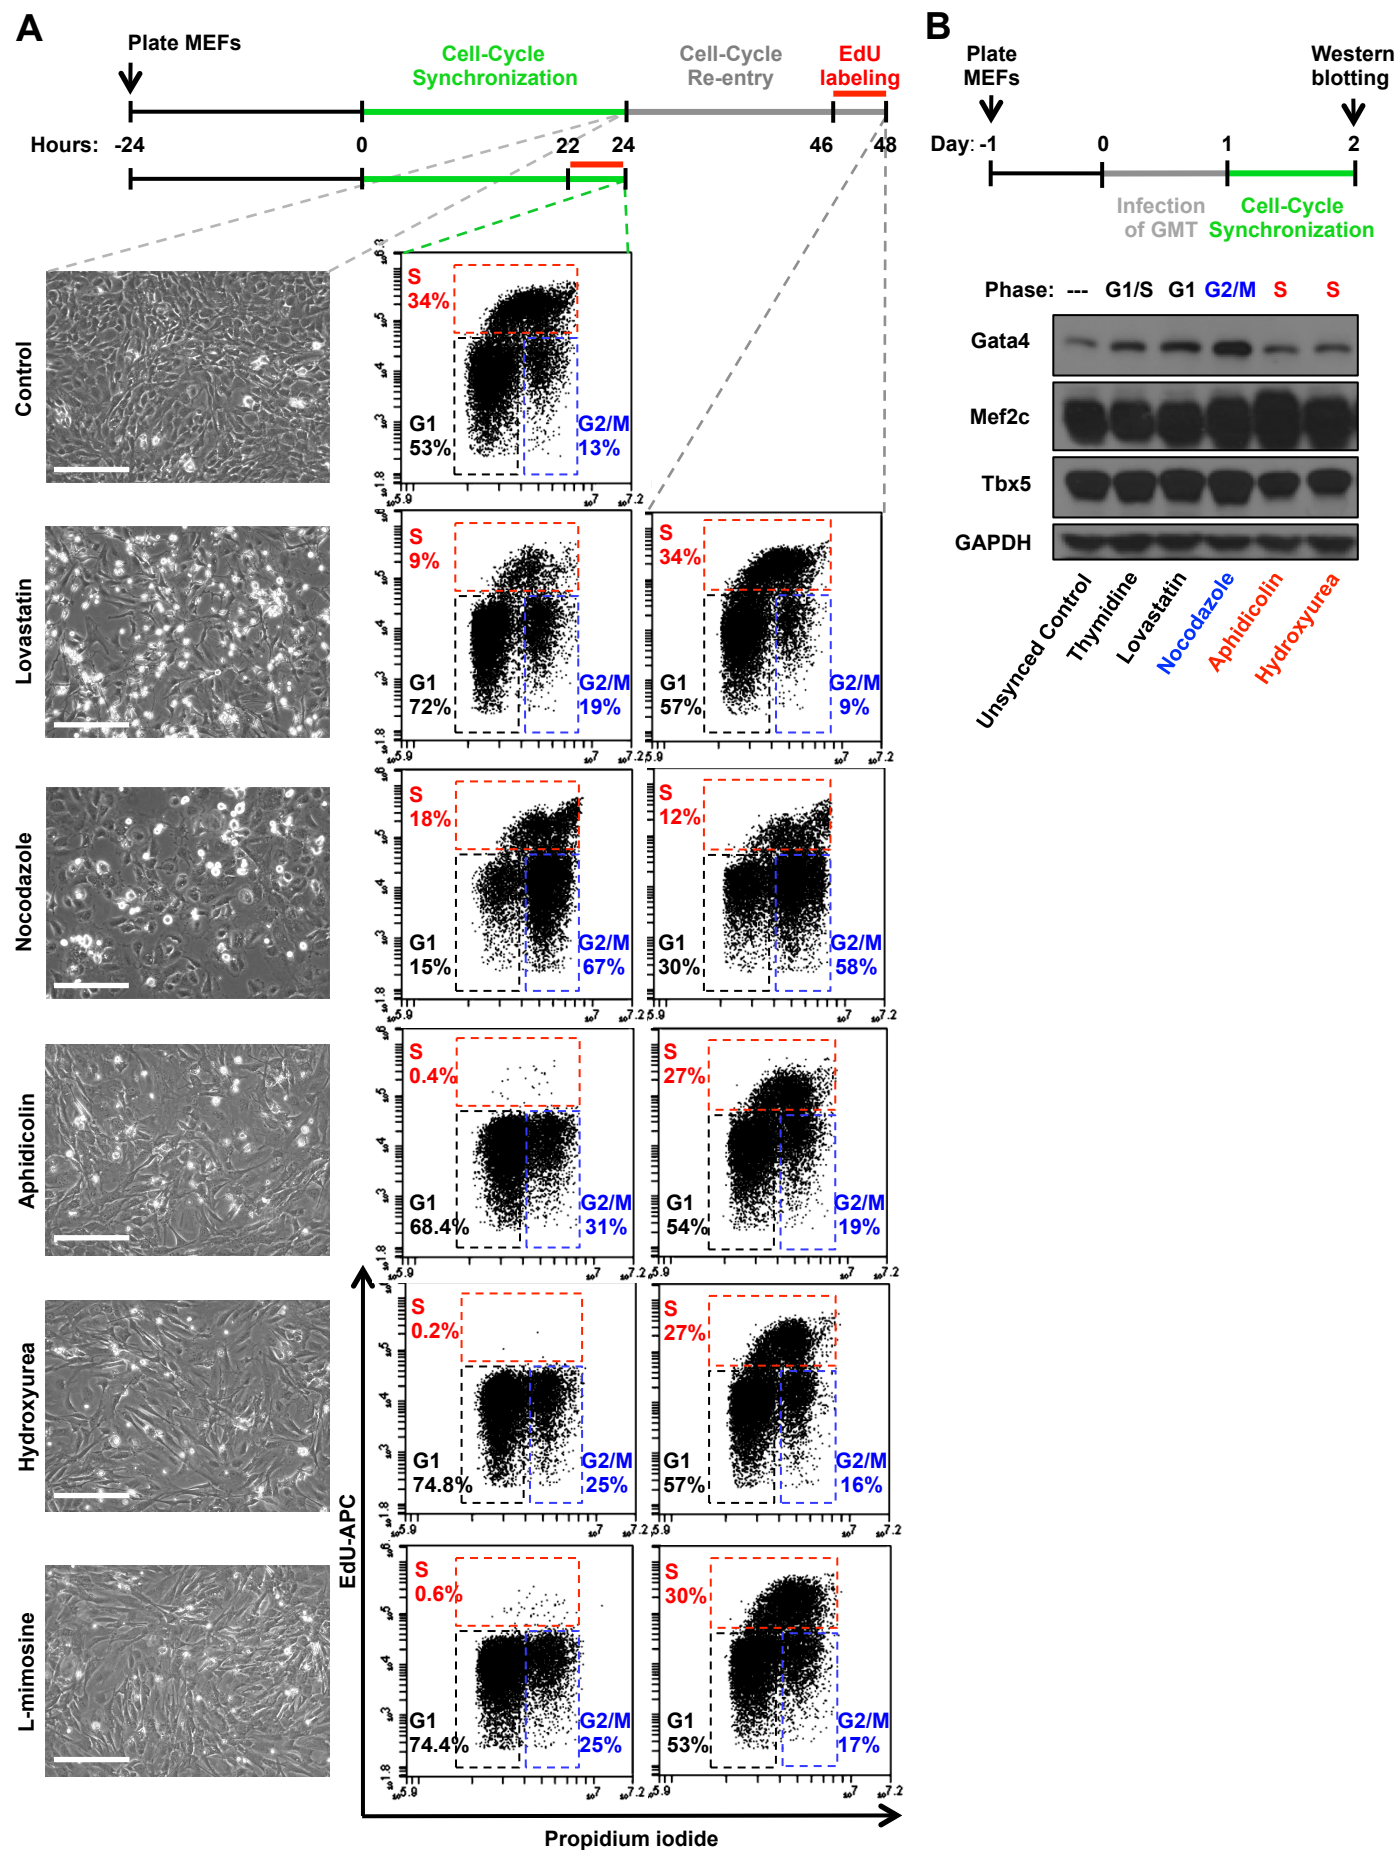

**Figure S2. Cell-cycle synchronization and reentrance of MEFs.** A) Representative pictures and FACS plots show that un-reprogrammed MEFs were synchronized into different cell-cycle phases by relevant treatments. Synchronized MEFs reentered cell cycle 24 hours after releasing from synchronization (Right). Scale bars indicate 50µm. B) Protein expressions of Gata4, Mef2c, and Tbx5 in MEFs were not inhibited by any treatments of cell-cycle synchronization.

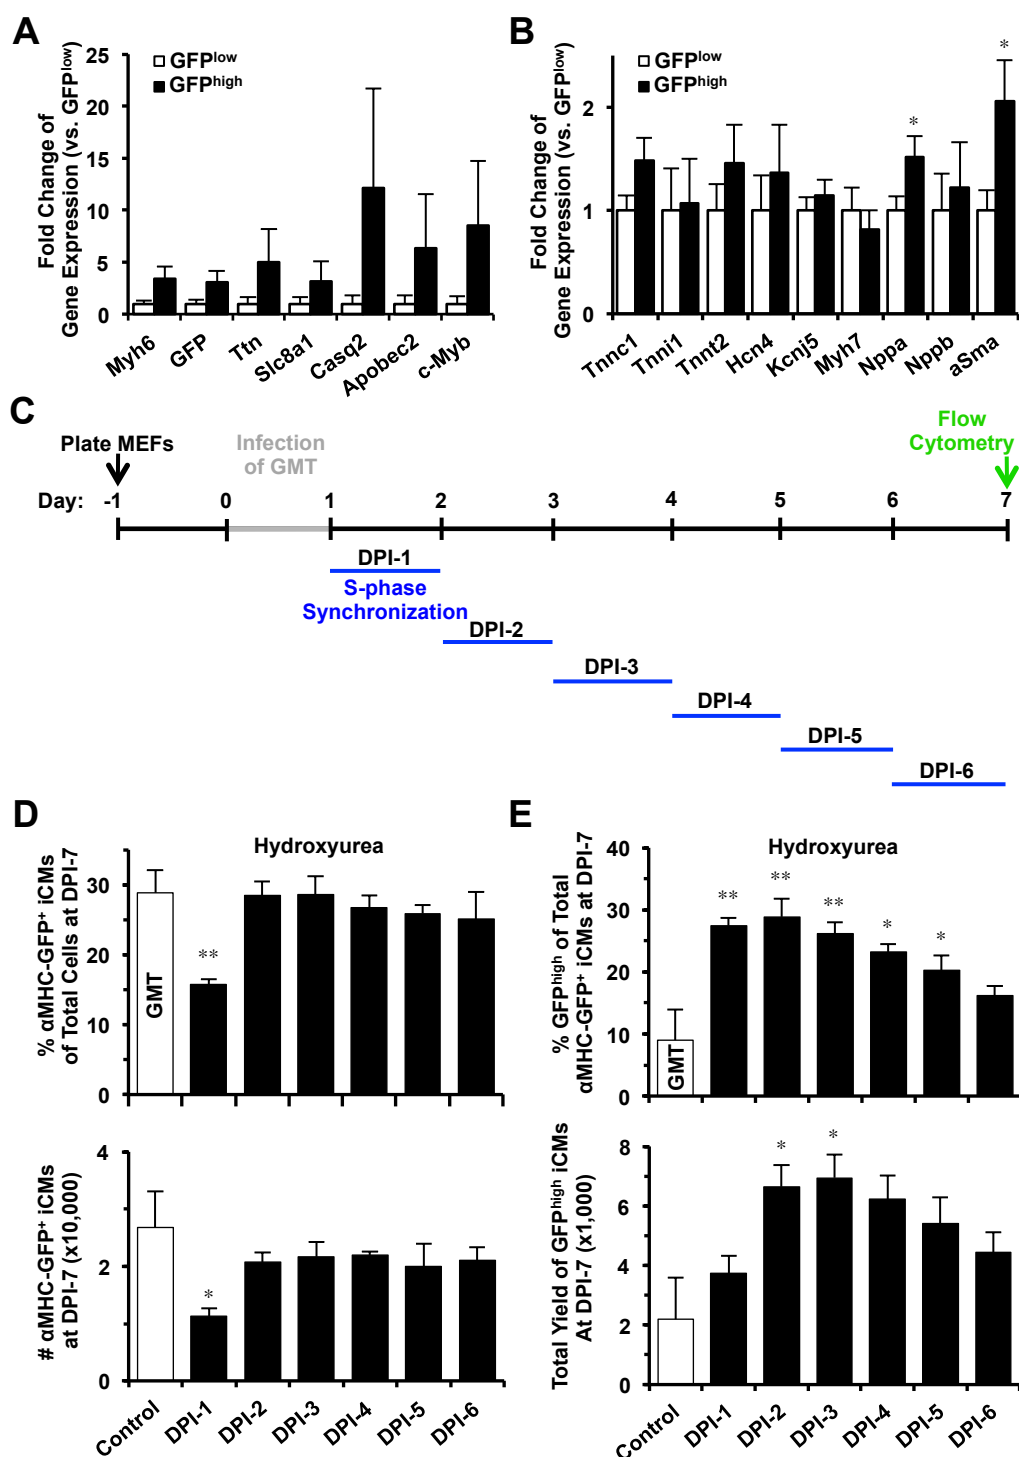

**Figure S3. S-phase synchronization increases the yield of GFP<sup>high</sup> iCMs.** A-B) Comparisons of cardiac gene expressions between GFP<sup>low</sup> and GFP<sup>high</sup> iCMs (n=6). \*p<0.05 vs. GFP<sup>low</sup>. C) Experimental design of S-phase synchronization from day-1 post-infection (DPI-1) to DPI-7. D) The effect of S-phase synchronization by hydroxyurea (n=3) from DPI-1 to DPI-6 on the percentage and absolute number of αMHC-GFP<sup>+</sup> GMT-iCMs. E) The effect of hydroxyurea-synchronization (n=4) from DPI-1 to DPI-6 on the percentage and total yield of GFP<sup>high</sup> iCMs. \*p<0.05; \*\*p<0.01, \*\*\*p<0.001 vs. control.

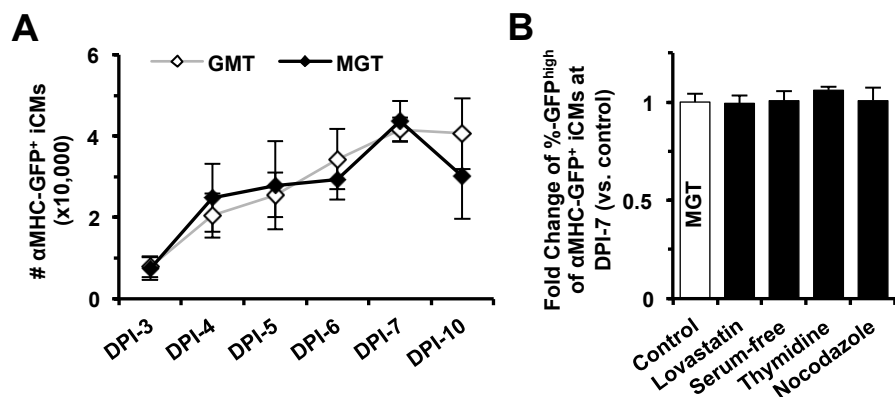

**Figure S4. The influence of cell-cycle synchronization on polycistronic MGT-reprogramming.** **A)** Polycistronic MGT successfully reprogrammed MEFs and yielded a similar number of  $\alpha$ MHC-GFP<sup>+</sup> iCMs as monocistronic GMT (n=3). **B)** Cell-cycle synchronizations of G1 (lovastatin and serum-free), G1/S (thymidine), and G2/M (nocodazole) at DPI-1 had no significant influence on the yield of GFP<sup>high</sup> MGT-iCMs

**SUPPLEMENTARY TABLES**

**Table S1.** Time from cell division back to reprogramming initiation in GMT-iCMs

| Total # of<br>time-lapsed<br>$\alpha$ MHC-GFP+<br>iCMs | Dividing<br>iCMs<br>used for<br>analysis | Time from cell<br>division back to<br>reprogramming<br>initiation (hours) |
|--------------------------------------------------------|------------------------------------------|---------------------------------------------------------------------------|
| Batch-1 (64 iCMs)                                      | #1                                       | 4.25                                                                      |
|                                                        | #2                                       | 19                                                                        |
|                                                        | #3                                       | 20                                                                        |
|                                                        | #4                                       | 12.5                                                                      |
|                                                        | #5                                       | 11.25                                                                     |
|                                                        | #6                                       | 14.5                                                                      |
|                                                        | #7                                       | 13.75                                                                     |
|                                                        | #8                                       | 13.5                                                                      |
|                                                        | #9                                       | 16.5                                                                      |
|                                                        | #10                                      | 9.25                                                                      |
|                                                        | #11                                      | 2                                                                         |
|                                                        | #12                                      | 15                                                                        |
|                                                        | #13                                      | 18                                                                        |
|                                                        | #14                                      | 5.5                                                                       |
|                                                        | #15                                      | 12.25                                                                     |
|                                                        | #16                                      | 4.5                                                                       |
|                                                        | #17                                      | 5.5                                                                       |
|                                                        | #18                                      | 6.25                                                                      |
| Batch-2 (26 iCMs)                                      | #19                                      | 14.75                                                                     |
|                                                        | #20                                      | 16.5                                                                      |
|                                                        | #21                                      | 14.5                                                                      |
|                                                        | #22                                      | 10                                                                        |
|                                                        | #23                                      | 14.75                                                                     |
|                                                        | #24                                      | 4.5                                                                       |
| Batch-3 (44 iCMs)                                      | #25                                      | 2.25                                                                      |
|                                                        | #26                                      | 18.25                                                                     |
|                                                        | #27                                      | 19.25                                                                     |
|                                                        | #28                                      | 21.5                                                                      |
|                                                        | #29                                      | 7.75                                                                      |
|                                                        | #30                                      | 18.75                                                                     |
|                                                        | #31                                      | 4.75                                                                      |
|                                                        | #32                                      | 5.75                                                                      |
|                                                        | #33                                      | 10.75                                                                     |
|                                                        | #34                                      | 14                                                                        |

**Table S2.** qRT-PCR primers for gene expression analysis of iCMs

| Gene    | Primer sets |                                                                   | Product size (bp) |
|---------|-------------|-------------------------------------------------------------------|-------------------|
| Atp2a2  | F<br>R      | 5'- TCTACGTGGAACCTTTGCCG -3'<br>5'- GCTGCACACACTCTTTACCG -3'      | 162               |
| MyI7    | F<br>R      | 5'- GGTCCCATCAACTTCACCGT -3'<br>5'- AAGGCACTCAGGATGGCTTC -3'      | 86                |
| Actc1   | F<br>R      | 5'- TGCCATGTATGTCGCCATCC -3'<br>5'- CACCATCGCCAGAATCCAGA -3'      | 86                |
| Ryr2    | F<br>R      | 5'- ACGGCGACCATCCACAAAG -3'<br>5'- AAAGTCTGTTGCCAAATCCTTCT -3'    | 67                |
| Myh6    | F<br>R      | 5'- GCCCAGTACCTCCGAAAGTC -3'<br>5'- GCCTTAACATACTCCTCCTTGTC -3'   | 110               |
| GFP     | F<br>R      | 5'- GGACGACGGCAACTACAAGA -3'<br>5'- AAGTCGATGCCCTTCAGCTC -3'      | 87                |
| Ttn     | F<br>R      | 5'- CCGATGTTTACGCAGCCGTTA -3'<br>5'- TCAAAGGTTGCGGTACTACCC -3'    | 62                |
| Slc8a1  | F<br>R      | 5'- CTTCCCTGTTTGTGCTCCTGT -3'<br>5'- AGAAGCCCTTTATGTGGCAGTA -3'   | 78                |
| Casq2   | F<br>R      | 5'- GCCCAACGTCATCCCTAACA -3'<br>5'- CCCATTCAAGTCGTCTTCCCA -3'     | 133               |
| Apobec2 | F<br>R      | 5'- GATCTTCCGCCCTTCGAGATT -3'<br>5'- TCTGACTTCGACCACATAGCA -3'    | 130               |
| c-Myb   | F<br>R      | 5'- AGACCCCGACACAGCATCTA -3'<br>5'- CAGCAGCCCATCGTAGTCAT -3'      | 81                |
| Tnnc-1  | F<br>R      | 5'- GGAGCTGTCGGATCTCTTCC -3'<br>5'- GGCCATCGTTGTTCTTGTCAC -3'     | 155               |
| Tnni-1  | F<br>R      | 5'- ACCATGCCGGAAGTTGAGAG -3'<br>5'- GAATGCGCTCCGAGAGGTAA -3'      | 151               |
| Tnnt-2  | F<br>R      | 5'- ACAGAGGAGGCCAACGTAGA -3'<br>5'- AAGTTGGGCATGAAGAGCCT -3'      | 113               |
| Hcn4    | F<br>R      | 5'- ACTCCTGGGGGAAGCAGTAT -3'<br>5'- GCCGATGAACATGGCATAGC -3'      | 158               |
| Kcnj5   | F<br>R      | 5'- ATACTCCTTCTGGTGCAGGC -3'<br>5'- GCTCTCTTCTTTGGCTGGCT -3'      | 95                |
| Myh7    | F<br>R      | 5'- ACTGTCAACACTAAGAGGGTCA -3'<br>5'- TTGGATGATTTGATCTTCCAGGG -3' | 114               |
| Nppa    | F<br>R      | 5'- CCCTCGGAGCCTACGAAGAT -3'<br>5'- TGTTGCAGCCTAGTCCACTC -3'      | 80                |
| Nppb    | F<br>R      | 5'- GATCCGTCAAGTCGTTTGGGC -3'<br>5'- AAAGAGACCCAGGCAGAGTCA -3'    | 98                |
| MKi67   | F<br>R      | 5'- ATCATTGACCGCTCCTTTAGGT -3'<br>5'- GCTCGCCTTGATGGTTCCT -3'     | 104               |
| aSMA    | F<br>R      | 5'- ATCACCAACTGGGACGACAT -3'<br>5'- CATAATGGCTGGGACATTG -3'       | 175               |
| Gapdh   | F<br>R      | 5'- AGGTCGGTGTGAACGGATTTG -3'<br>5'- TGTAGACCATGTAGTTGAGGTCA -3'  | 123               |

## **SUPPLEMENTARY MOVIE LEGENDS**

**Movie S1.** A time-lapse recording movie of GFP-fluorescence images (Left) and overlay of GFP and brightfield images (Right) showing that GMT-iCMs underwent cell division from DPI-2 to DPI-4.

**Movie S2.** A time-lapse recording movie of GFP-fluorescence images showing that MGT-iCMs underwent cell division from DPI-2 to DPI-4.
